# Supplementary material for: Lipid Profiling Reveals Lipidomic Signatures of Weight Loss Interventions
Source: MDPI journal article supplement (doi:10.3390/nu15071784), 2023-04-06
Supplement: s1 [file s1]

## Supplementary Materials:

**Supplementary Table S1.** VIP scores of PLSDA analysis.

|     | Exercise | LSG      | Cushing   |
|-----|----------|----------|-----------|
| LPC | 1.33403  | 1.49417  | 0.537296  |
| SM  | 1.20663  | 0.743749 | 0.820176  |
| TG  | 1.03045  | 1.05002  | 0.966597  |
| DG  | 0.949263 | 0.982946 | 0.628143  |
| PS  | 0.919605 | 0.727666 | 1.65306   |
| PC  | 0.868191 | 0.959442 | 1.19942   |
| PE  | 0.842632 | 0.958827 | 1.24025   |
| PI  | 0.701442 | 0.881015 | 0.0173637 |

**Supplementary Table S2.** Weight loss of the three studies.

| Exercise    |                    |                                  | LSG    |                    |                                  | Cushing    |                    |                                  |
|-------------|--------------------|----------------------------------|--------|--------------------|----------------------------------|------------|--------------------|----------------------------------|
| ID          | Body weight change | Percentage of body weight change | ID     | Body weight change | Percentage of body weight change | ID         | Body weight change | Percentage of body weight change |
| exercise_1  | 3.8                | 6                                | LSG_1  | 32                 | 28                               | cushing_1  | 7                  | 10                               |
| exercise_2  | 5.4                | 7                                | LSG_2  | 19                 | 19                               | cushing_2  | 7                  | 11                               |
| exercise_3  | 10.3               | 10                               | LSG_3  | 24                 | 23                               | cushing_3  | 5                  | 8                                |
| exercise_4  | 11                 | 11                               | LSG_4  | 21                 | 21                               | cushing_4  | 4                  | 5                                |
| exercise_5  | 5.2                | 9                                | LSG_5  | 45                 | 40                               | cushing_5  | 3                  | 4                                |
| exercise_6  | 12.8               | 13                               | LSG_6  | 25                 | 22                               | cushing_6  | 5                  | 6                                |
| exercise_7  | 7.4                | 10                               | LSG_7  | 34                 | 28                               | cushing_7  | 3                  | 6                                |
| exercise_8  | 7.85               | 10                               | LSG_8  | 26.5               | 26                               | cushing_8  | 10                 | 13                               |
| exercise_9  | 7.1                | 8                                | LSG_9  | 27                 | 18                               | cushing_9  | 5                  | 7                                |
| exercise_10 | 10.7               | 8                                | LSG_10 | 34                 | 31                               | cushing_10 | 8                  | 14                               |
| exercise_11 | 5.5                | 11                               | LSG_11 | 32                 | 28                               | cushing_11 | 15                 | 19                               |
| exercise_12 | 6.2                | 10                               | LSG_12 | 45                 | 31                               | cushing_12 | 3                  | 6                                |
| exercise_13 | 6.2                | 10                               | LSG_13 | 35.7               | 34                               | cushing_13 | 17.5               | 22                               |
| exercise_14 | 7.1                | 9                                | LSG_14 | 25.8               | 26                               | cushing_14 | 5                  | 8                                |
| exercise_15 | 11.1               | 12                               | LSG_15 | 11                 | 9                                | cushing_15 | 8                  | 12                               |
| exercise_16 | 5                  | 7                                | LSG_16 | 40                 | 29                               | cushing_16 | 13.5               | 24                               |
| exercise_17 | 9.5                | 10                               | LSG_17 | 27.2               | 22                               | cushing_17 | 5                  | 9                                |
| exercise_18 | 10.4               | 12                               | LSG_18 | 19.5               | 25                               | cushing_18 | 3.3                | 6                                |
| exercise_19 | 6.5                | 11                               | LSG_19 | 22                 | 24                               | cushing_19 | 5.2                | 8                                |
| exercise_20 | 11.2               | 11                               | LSG_20 | 19                 | 21                               | cushing_20 | 3.5                | 6                                |
| exercise_21 | 9.15               | 11                               | LSG_21 | 51                 | 40                               | cushing_21 | 5                  | 9                                |
| exercise_22 | 10.9               | 12                               | LSG_22 | 23                 | 30                               | cushing_22 | 6                  | 9                                |
| exercise_23 | 11.9               | 10                               | LSG_23 | 30                 | 31                               | cushing_23 | 4                  | 7                                |
| exercise_24 | 10.2               | 12                               | LSG_24 | 23                 | 22                               | cushing_24 | 9                  | 17                               |
| exercise_25 | 9.8                | 12                               | LSG_25 | 42                 | 30                               | cushing_25 | 12                 | 14                               |
|             |                    |                                  | LSG_26 | 31                 | 26                               |            |                    |                                  |
|             |                    |                                  | LSG_27 | 26                 | 23                               |            |                    |                                  |
|             |                    |                                  | LSG_28 | 39.2               | 28                               |            |                    |                                  |
|             |                    |                                  | LSG_29 | 36.4               | 28                               |            |                    |                                  |
|             |                    |                                  | LSG_30 | 19                 | 22                               |            |                    |                                  |
|             |                    |                                  | LSG_31 | 20                 | 21                               |            |                    |                                  |
|             |                    |                                  | LSG_32 | 33                 | 27                               |            |                    |                                  |
|             |                    |                                  | LSG_33 | 44                 | 36                               |            |                    |                                  |
|             |                    |                                  | LSG_34 | 20                 | 18                               |            |                    |                                  |
|             |                    |                                  | LSG_35 | 26                 | 24                               |            |                    |                                  |
|             |                    |                                  | LSG_36 | 30                 | 26                               |            |                    |                                  |

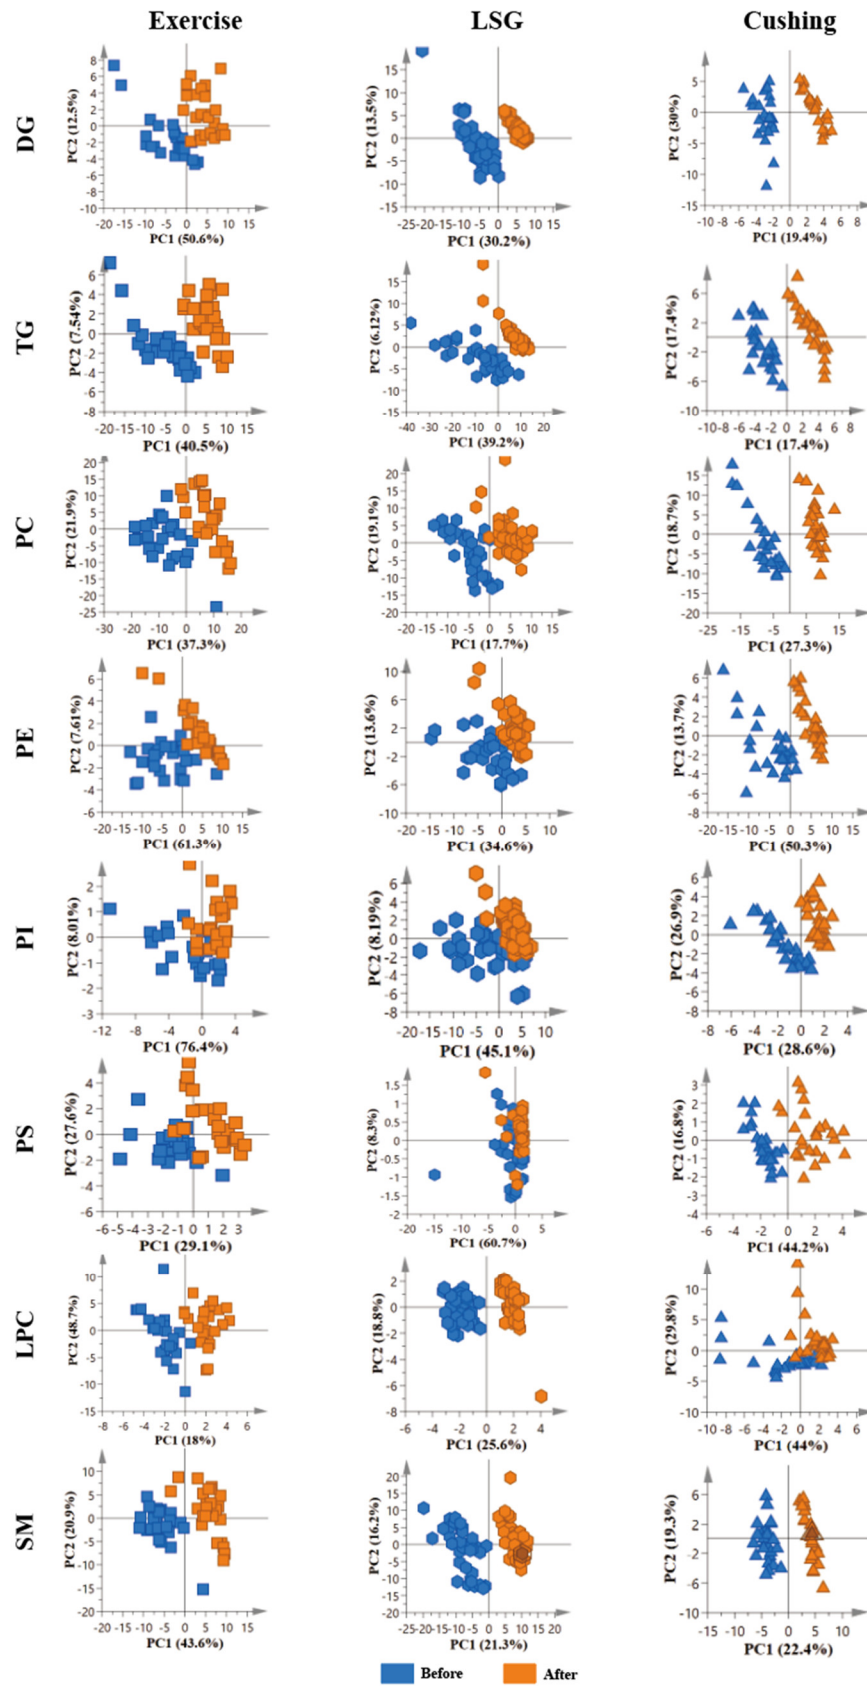

**Supplementary Figure S1.** Partial least squares discriminant analysis (PLSDA). Samples before intervention is marked in blue, samples after intervention is marked in orange.

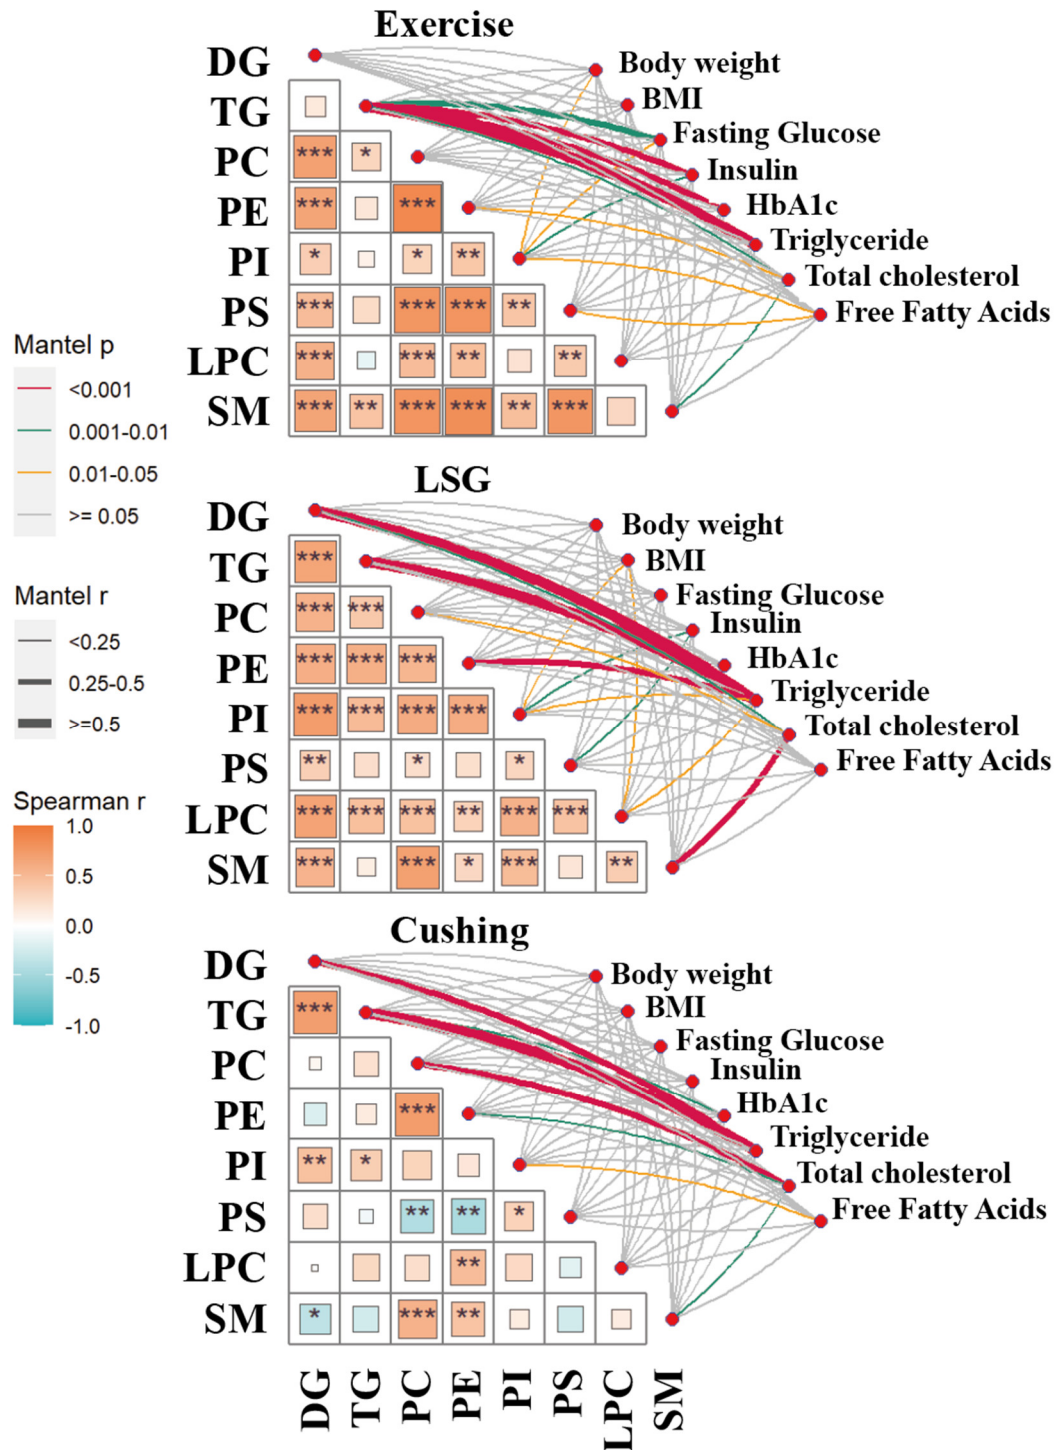

**Supplementary Figure S2.** Spearman rank correlation coefficients of class sums. Pairwise comparisons of 8 lipid subclasses are shown, with a color gradient denoting Spearman's correlation coefficients, \* $p < 0.05$ , \*\* $p < 0.01$ , \*\*\* $p < 0.001$ . Lipid subclasses were related to each clinical factor by partial (geographic distance-corrected) Mantel tests. Edge width corresponds to the Mantel's  $r$  statistic for the corresponding distance correlations, and edge color denotes the statistical significance based on 9,999 permutations.

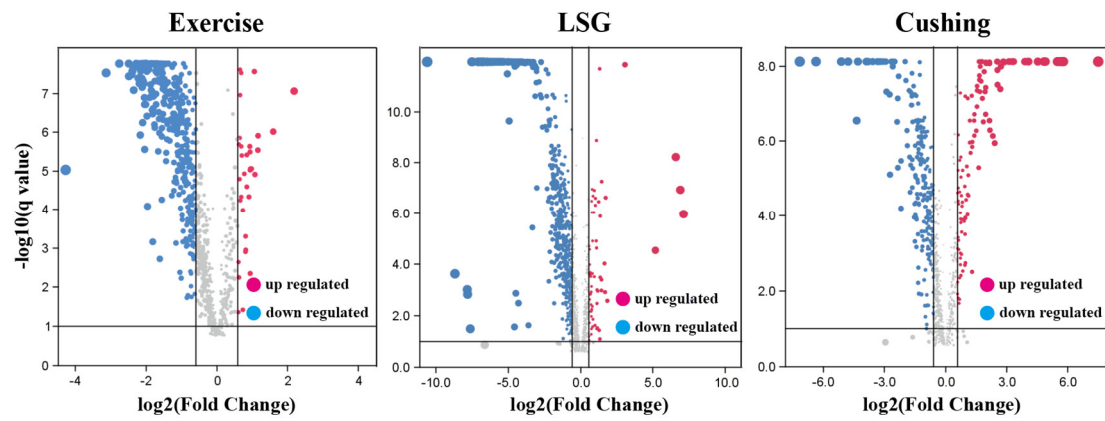

**Supplementary Figure S3.** Volcano plot of lipid species indicating lipid changes associated with weight loss interventions (fold change > 1.5 and q value < 0.1 by Wilcoxon Signed Rank Test, q value was calculated using the q value package based on the default settings).
